# Supplementary material for: The new-generation selective ROS1/NTRK inhibitor DS-6051b overcomes crizotinib resistant ROS1-G2032R mutation in preclinical models
Source: PubMed Central journal article supplement (PMC6688997; doi:10.1038/s41467-019-11496-z), 2019-08-09

Supplementary Data: Original uncropped image of immunoblots (Fig 1f)

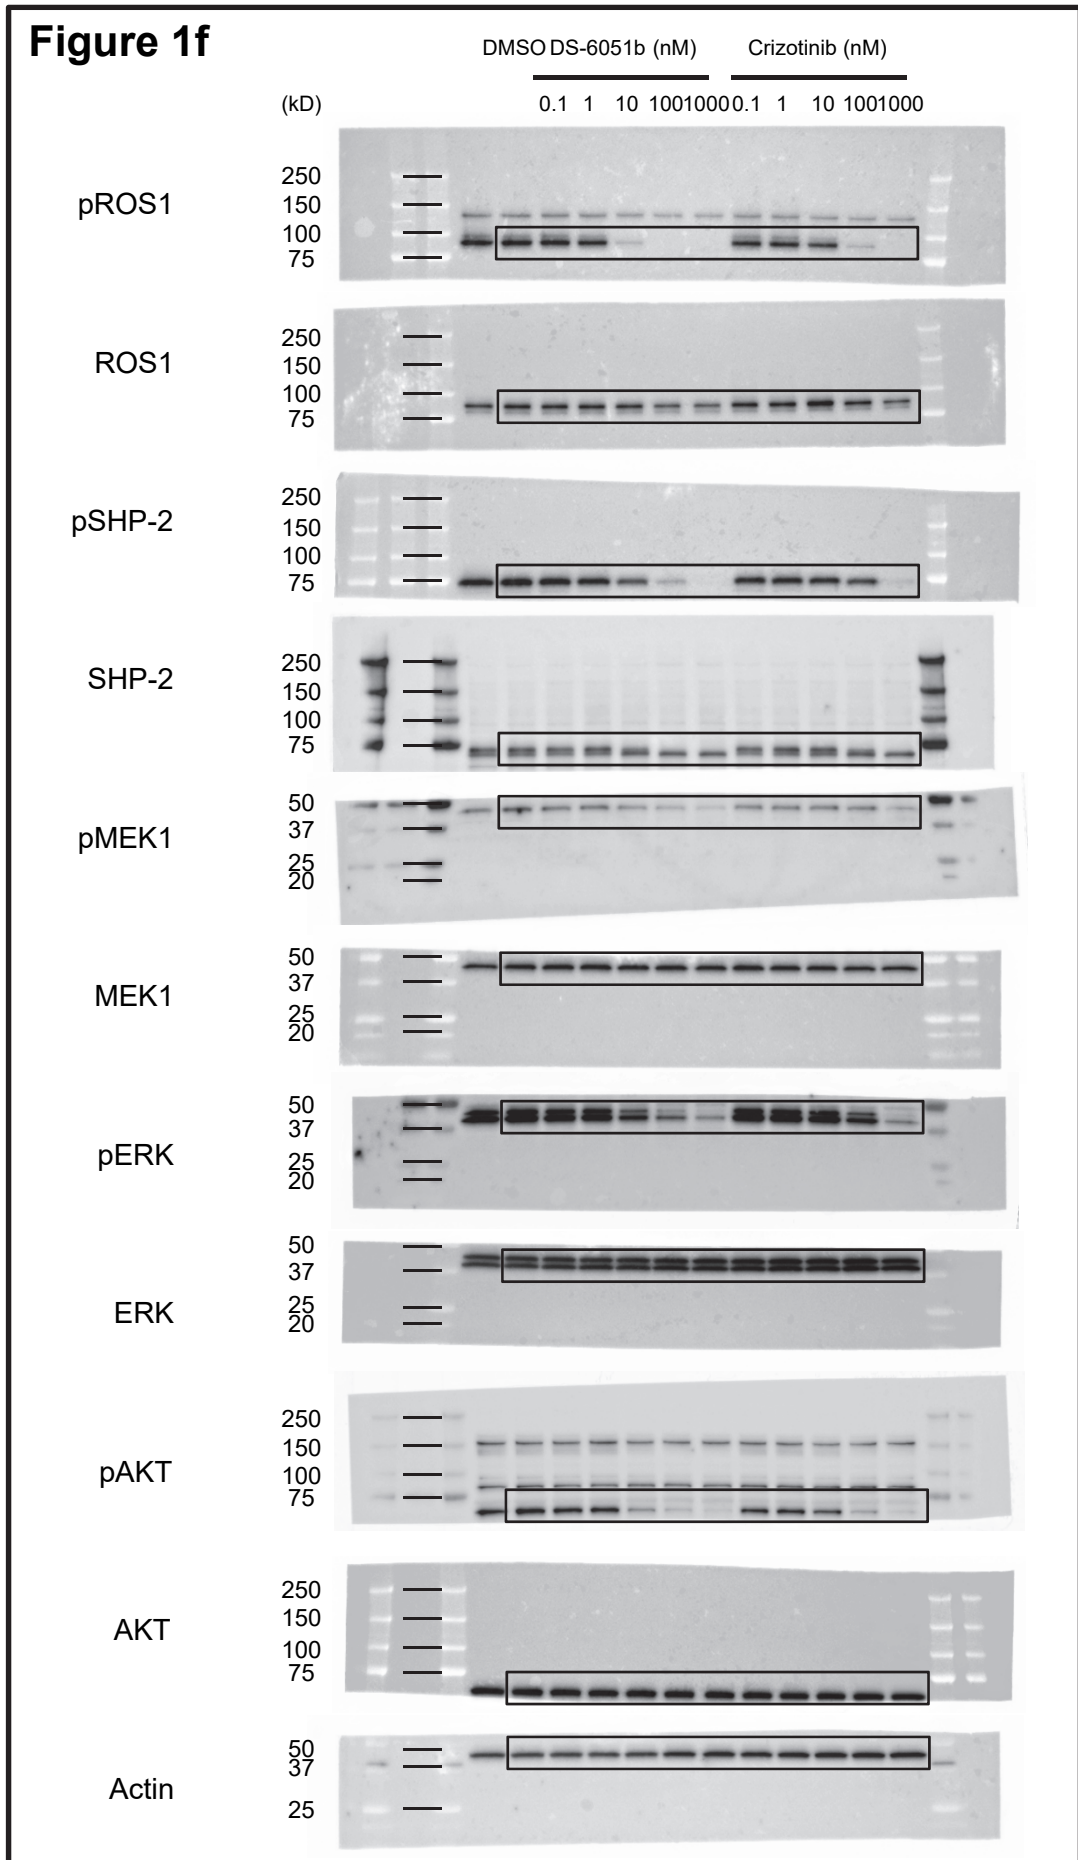

Supplementary Data: Original uncropped image of immunoblots (Fig 1g)

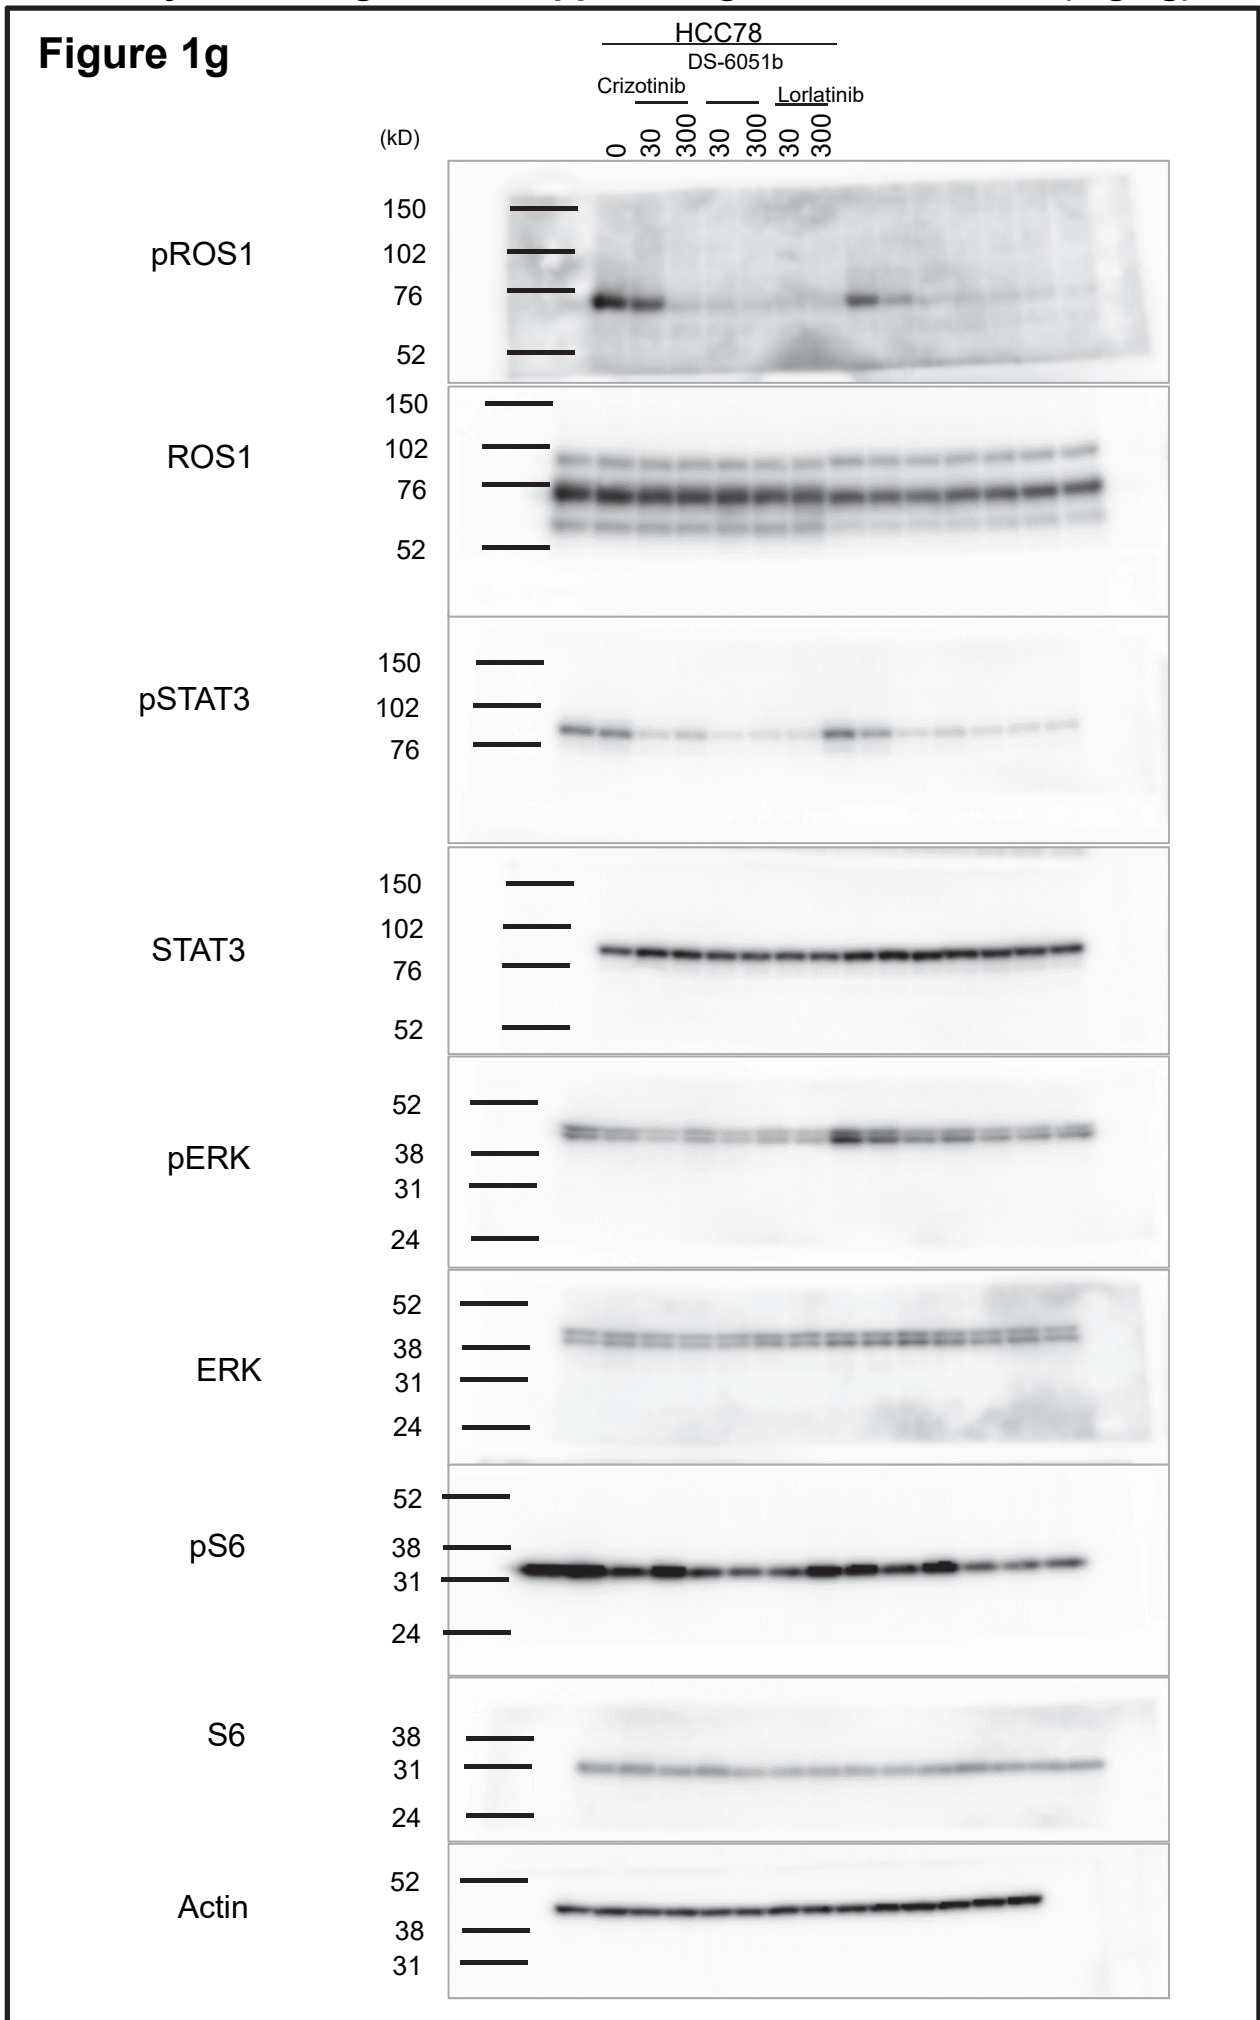

Supplementary Data: Original uncropped image of immunoblots (Fig 2d)

WB of JFCR-165

d

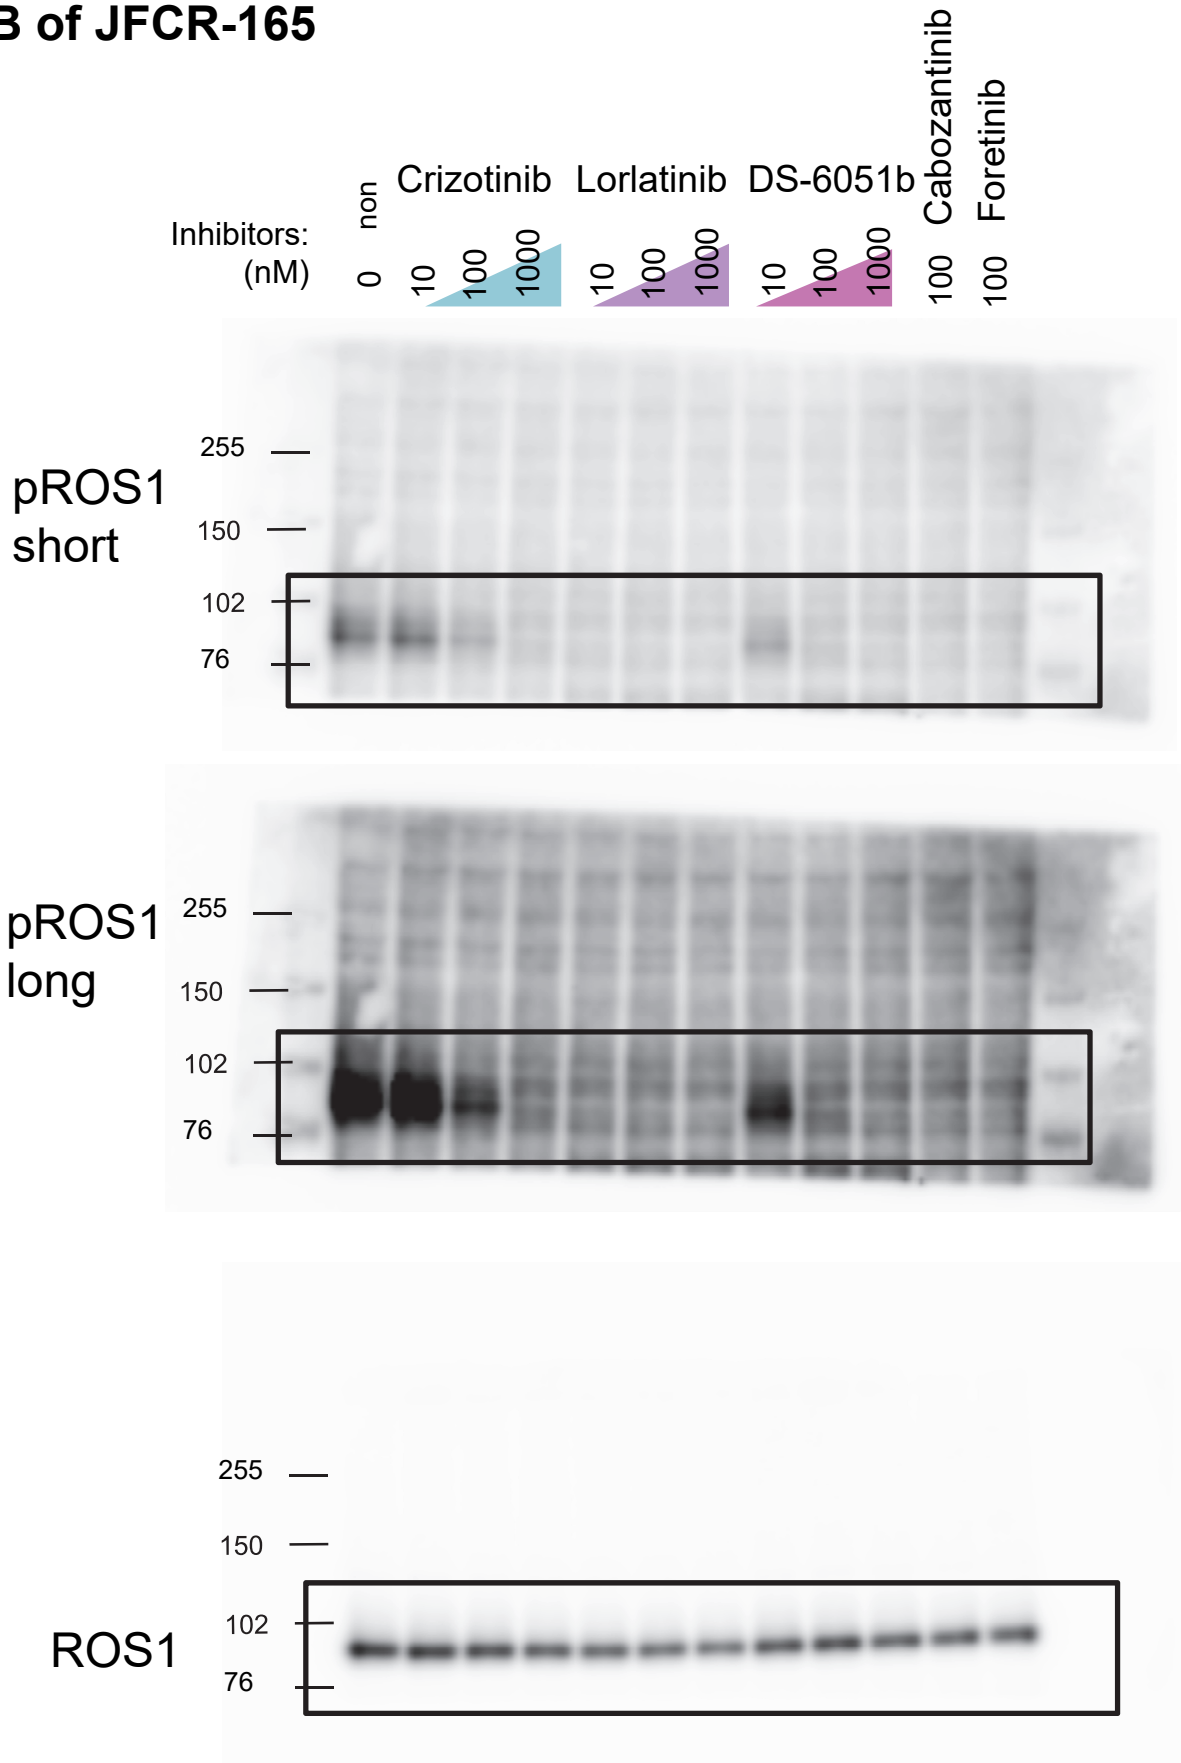

Supplementary Data: Original uncropped image of immunoblots (Fig 2d)

WB of JFCR-165

d

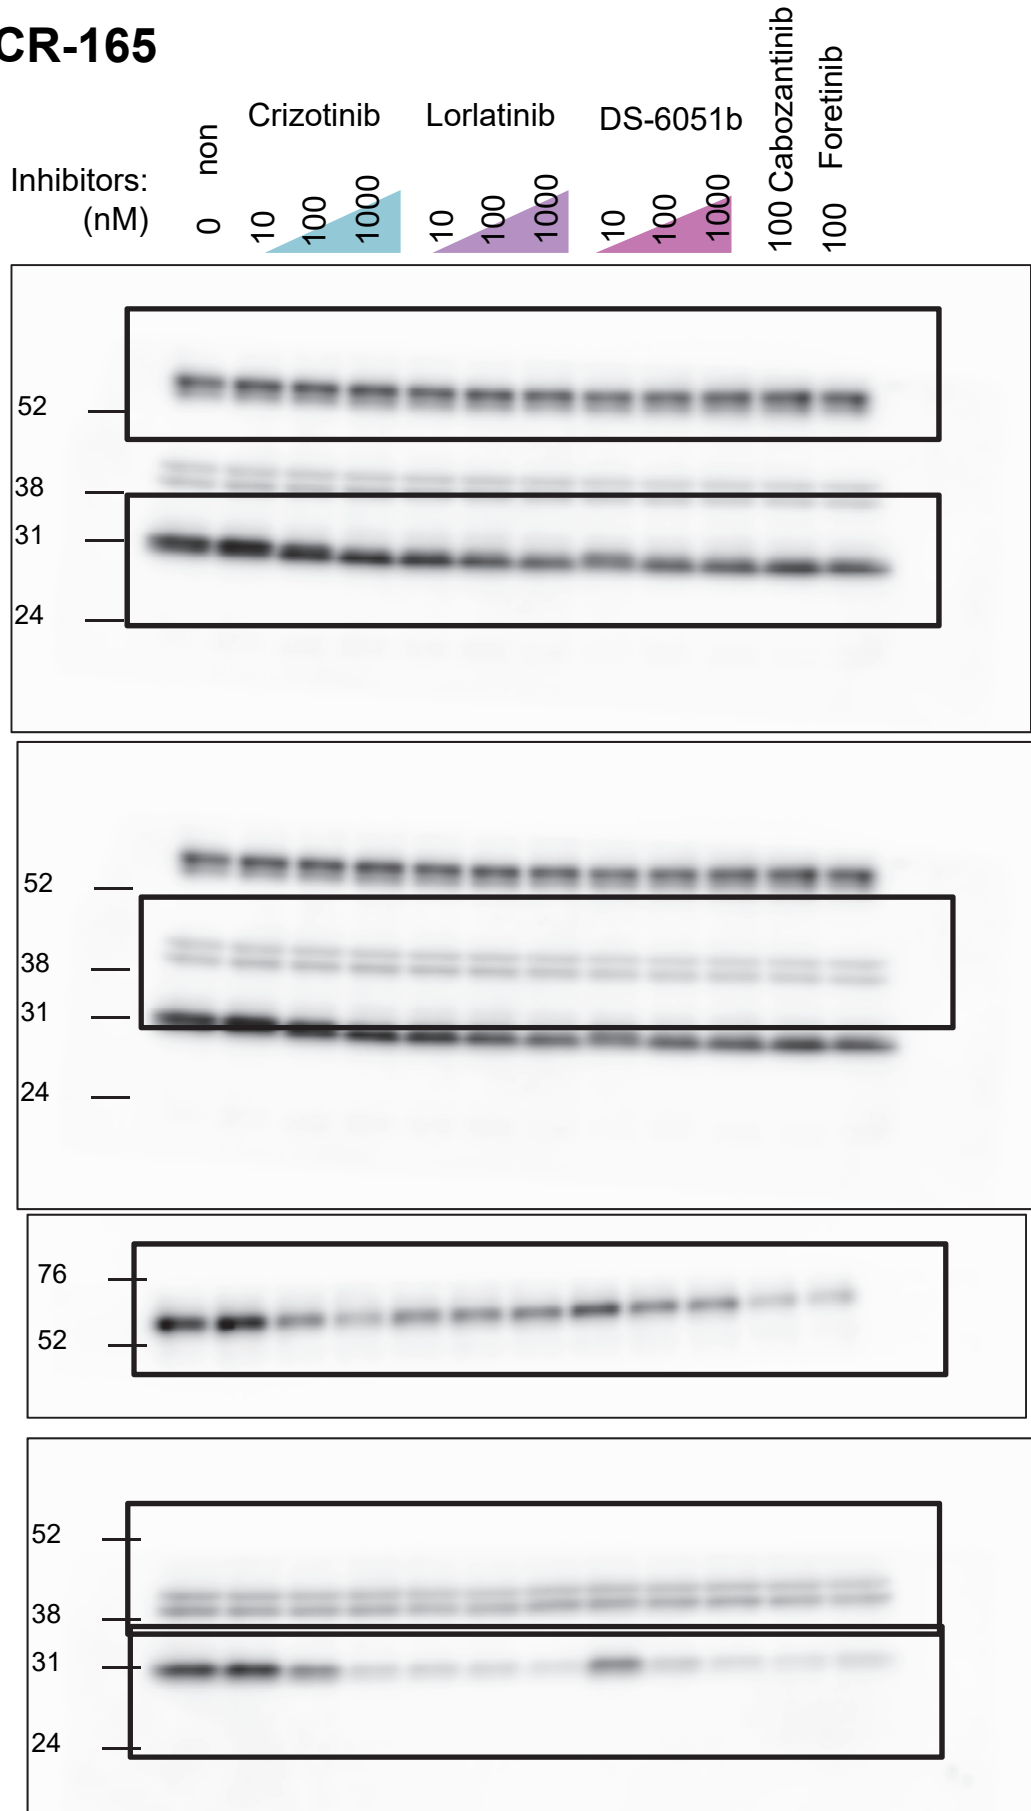



Supplementary Data: Original uncropped image of immunoblots (Fig 2d)

WB of JFCR-165

d

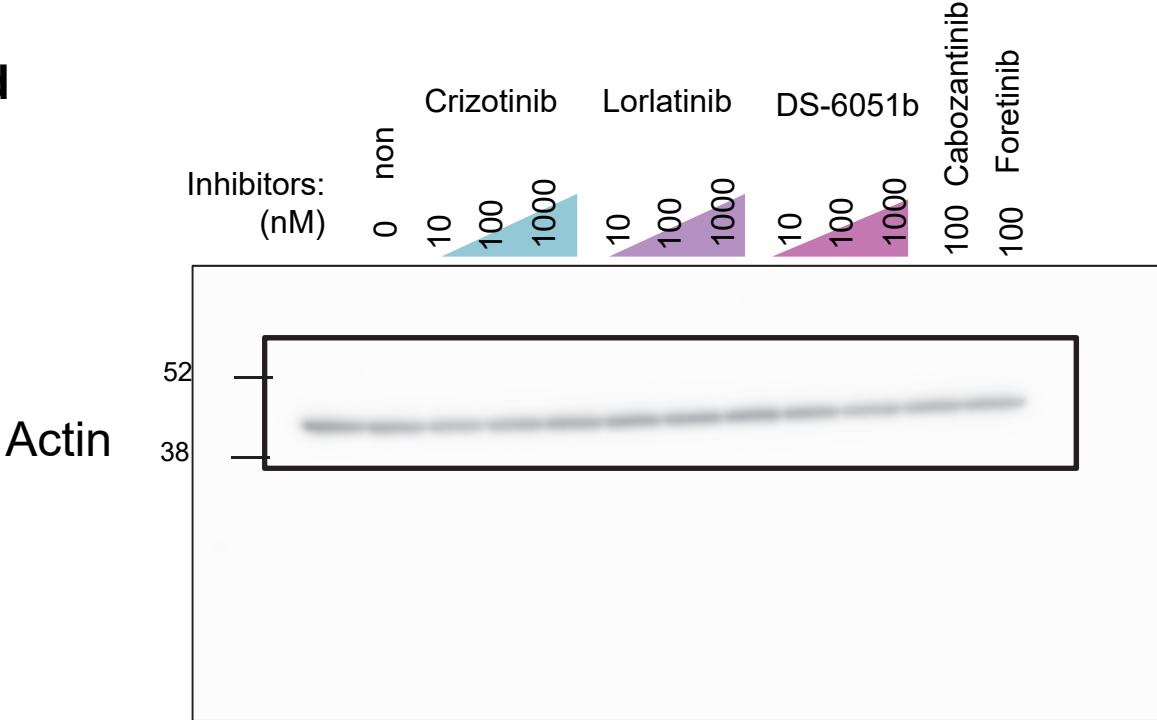

Supplementary Data: Original uncropped image of immunoblots (Fig 2e)

WB of JFCR-168

e

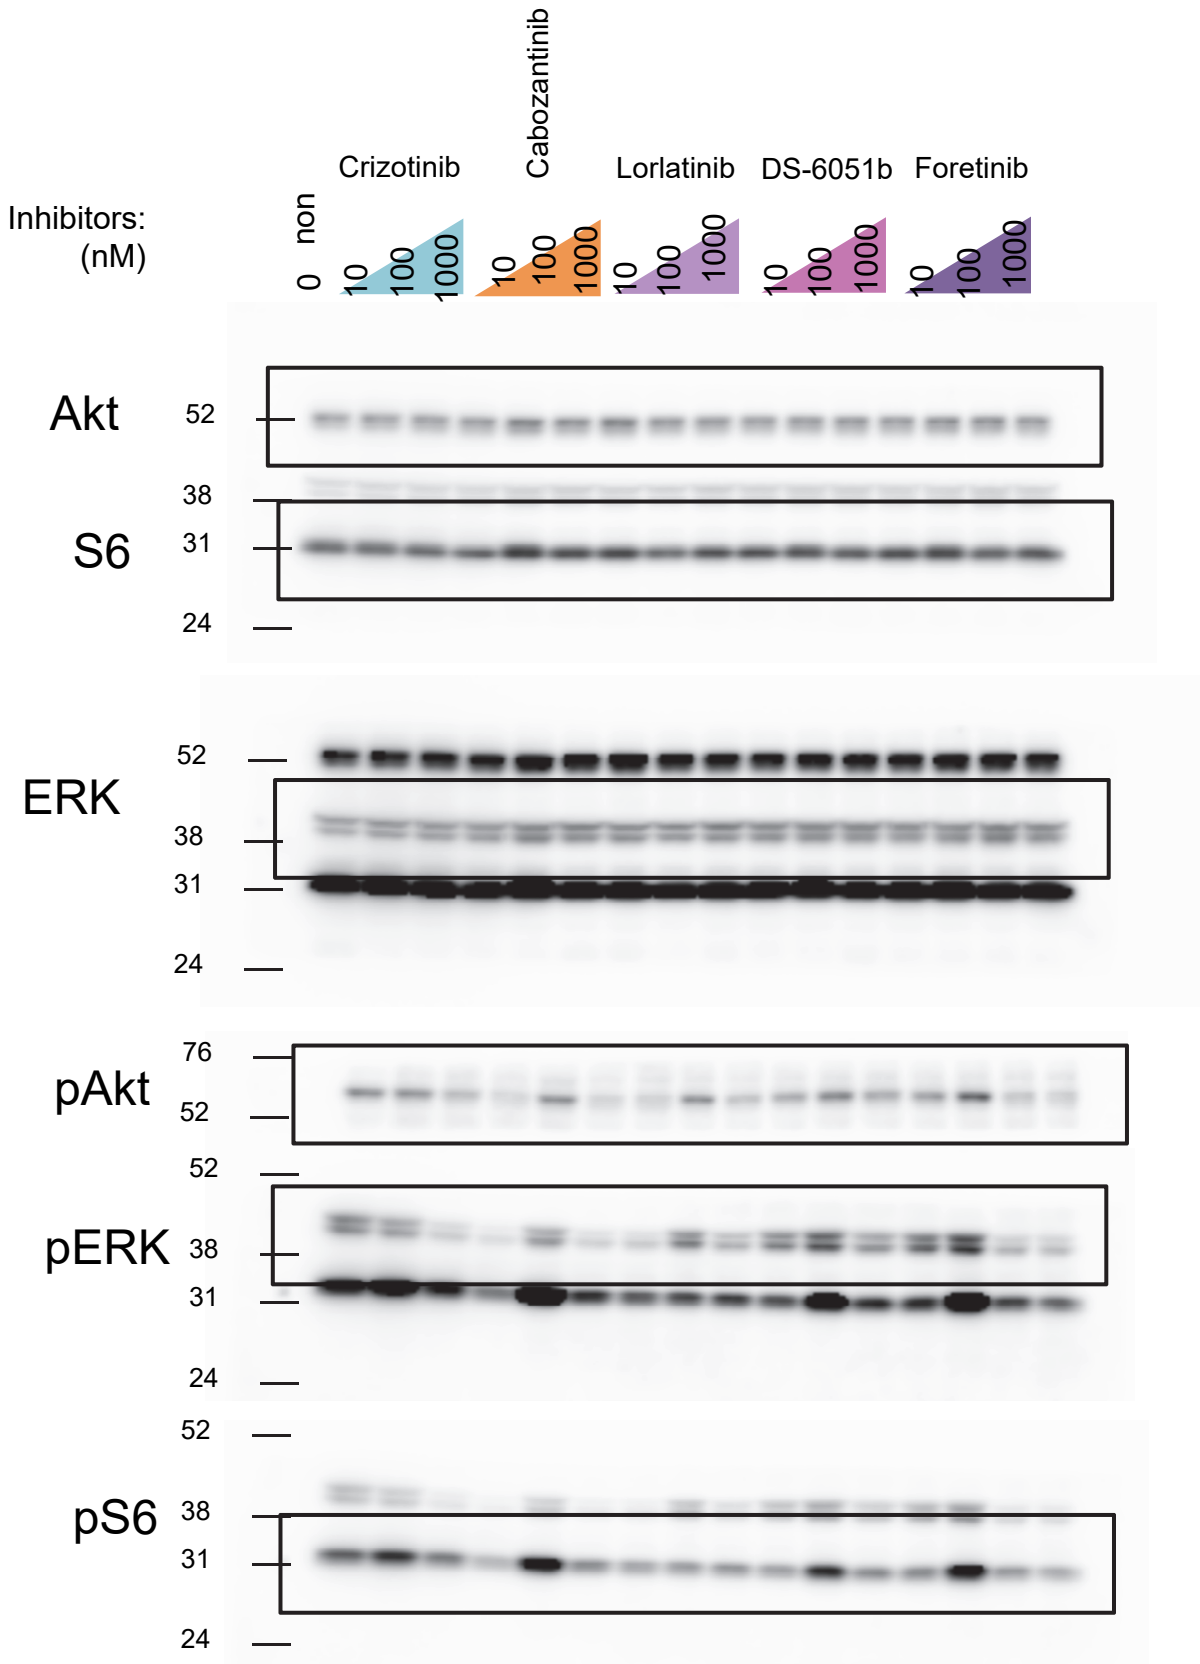

Supplementary Data: Original uncropped image of immunoblots (Fig 2e)

WB of JFCR-168

e

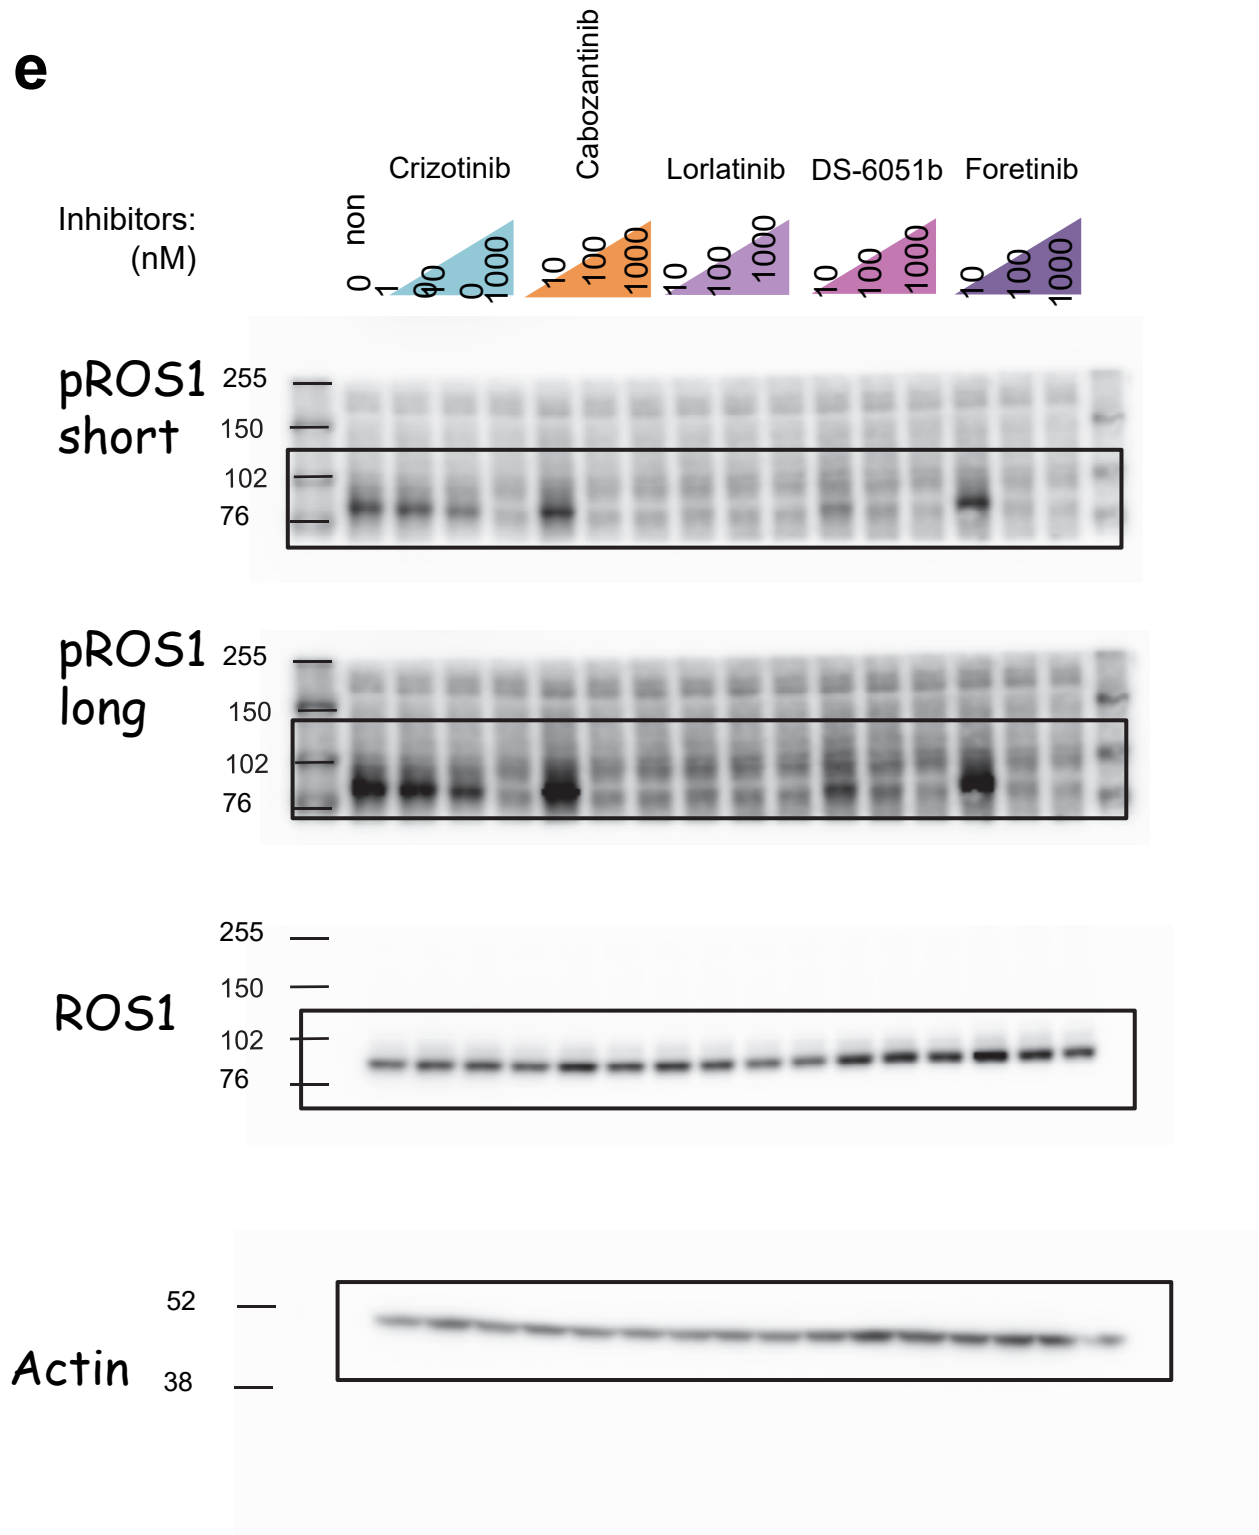

Supplementary Data: Original uncropped image of immunoblots (Fig 2f)

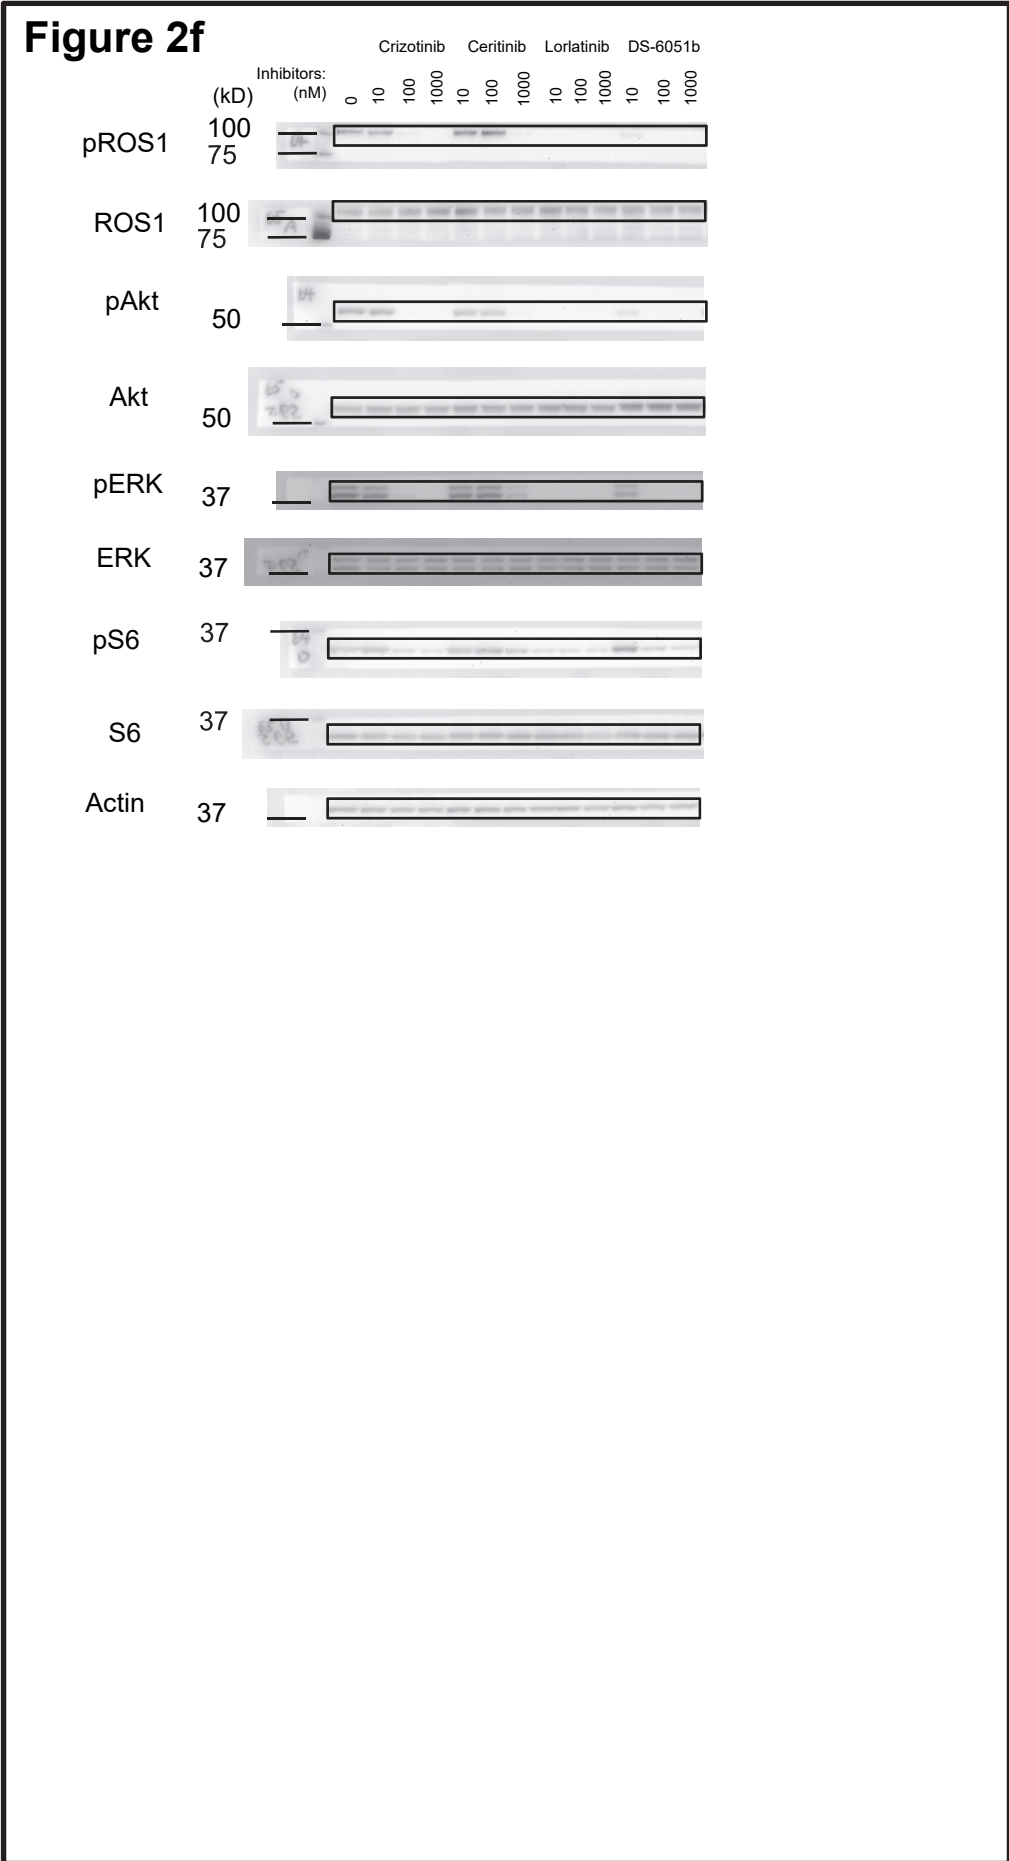

Supplementary Data: Original uncropped image of immunoblots (Fig 2g)

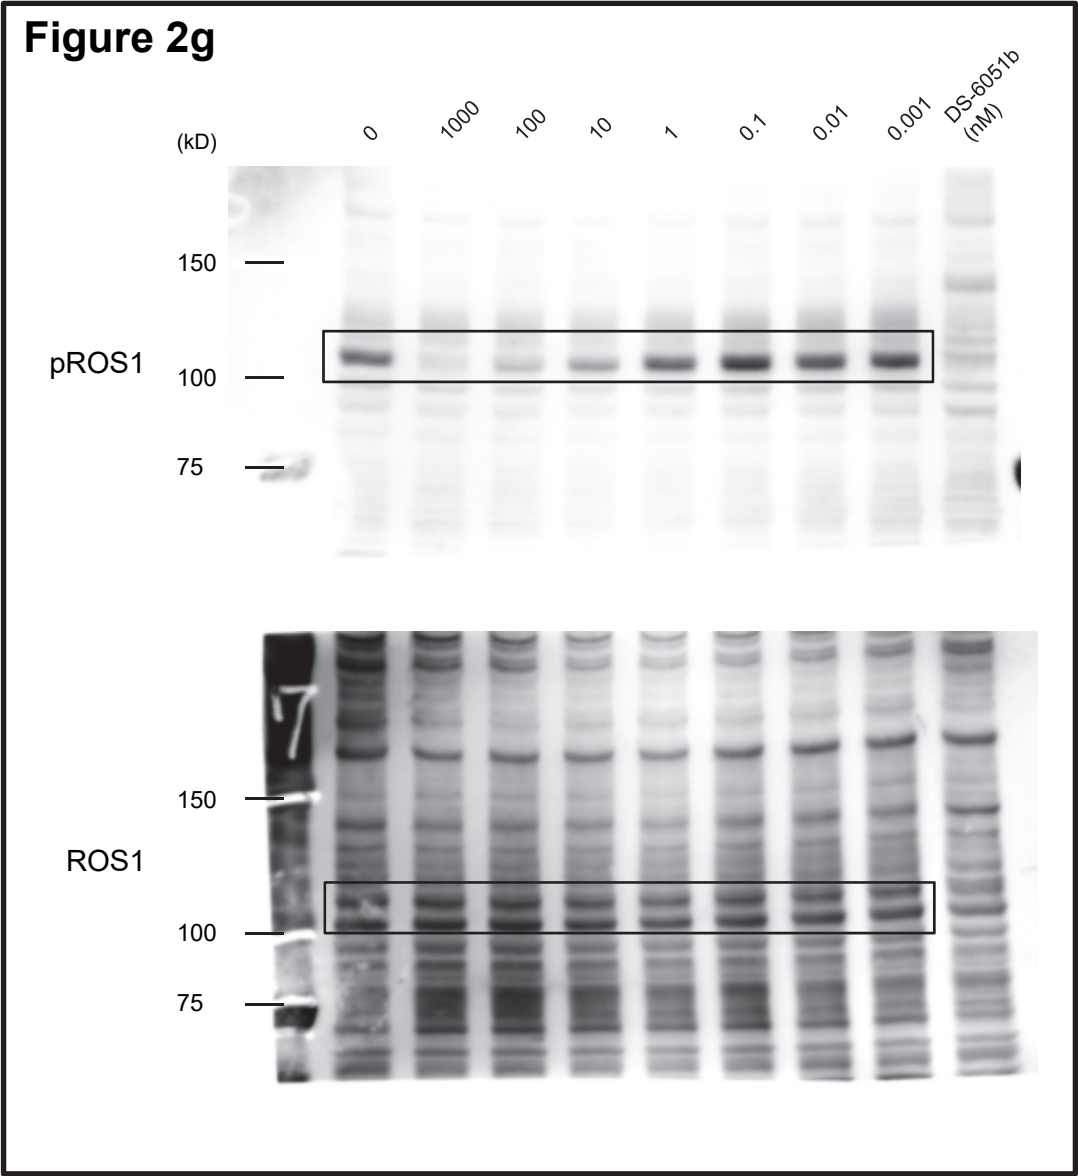



Supplementary Data: Original uncropped image of immunoblots (Fig 3d)

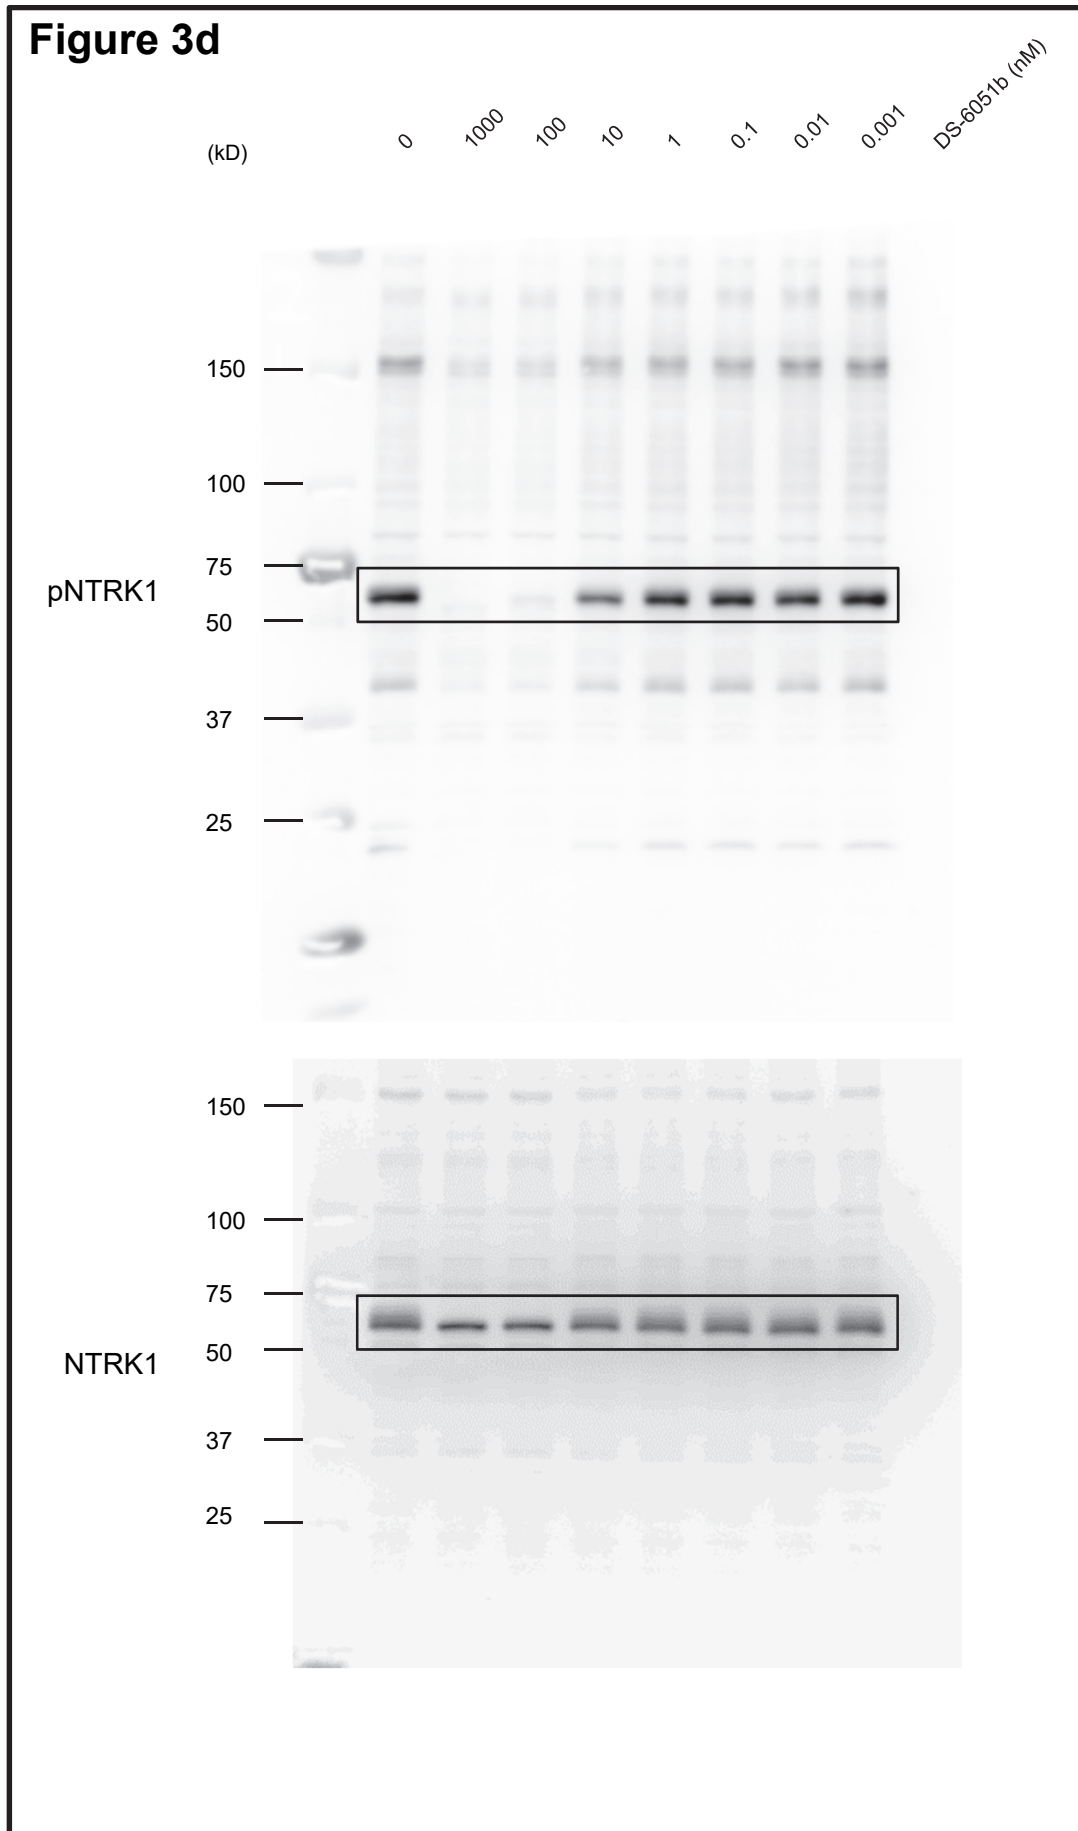

Supplementary Data: Original uncropped image of immunoblots (Fig 4c)

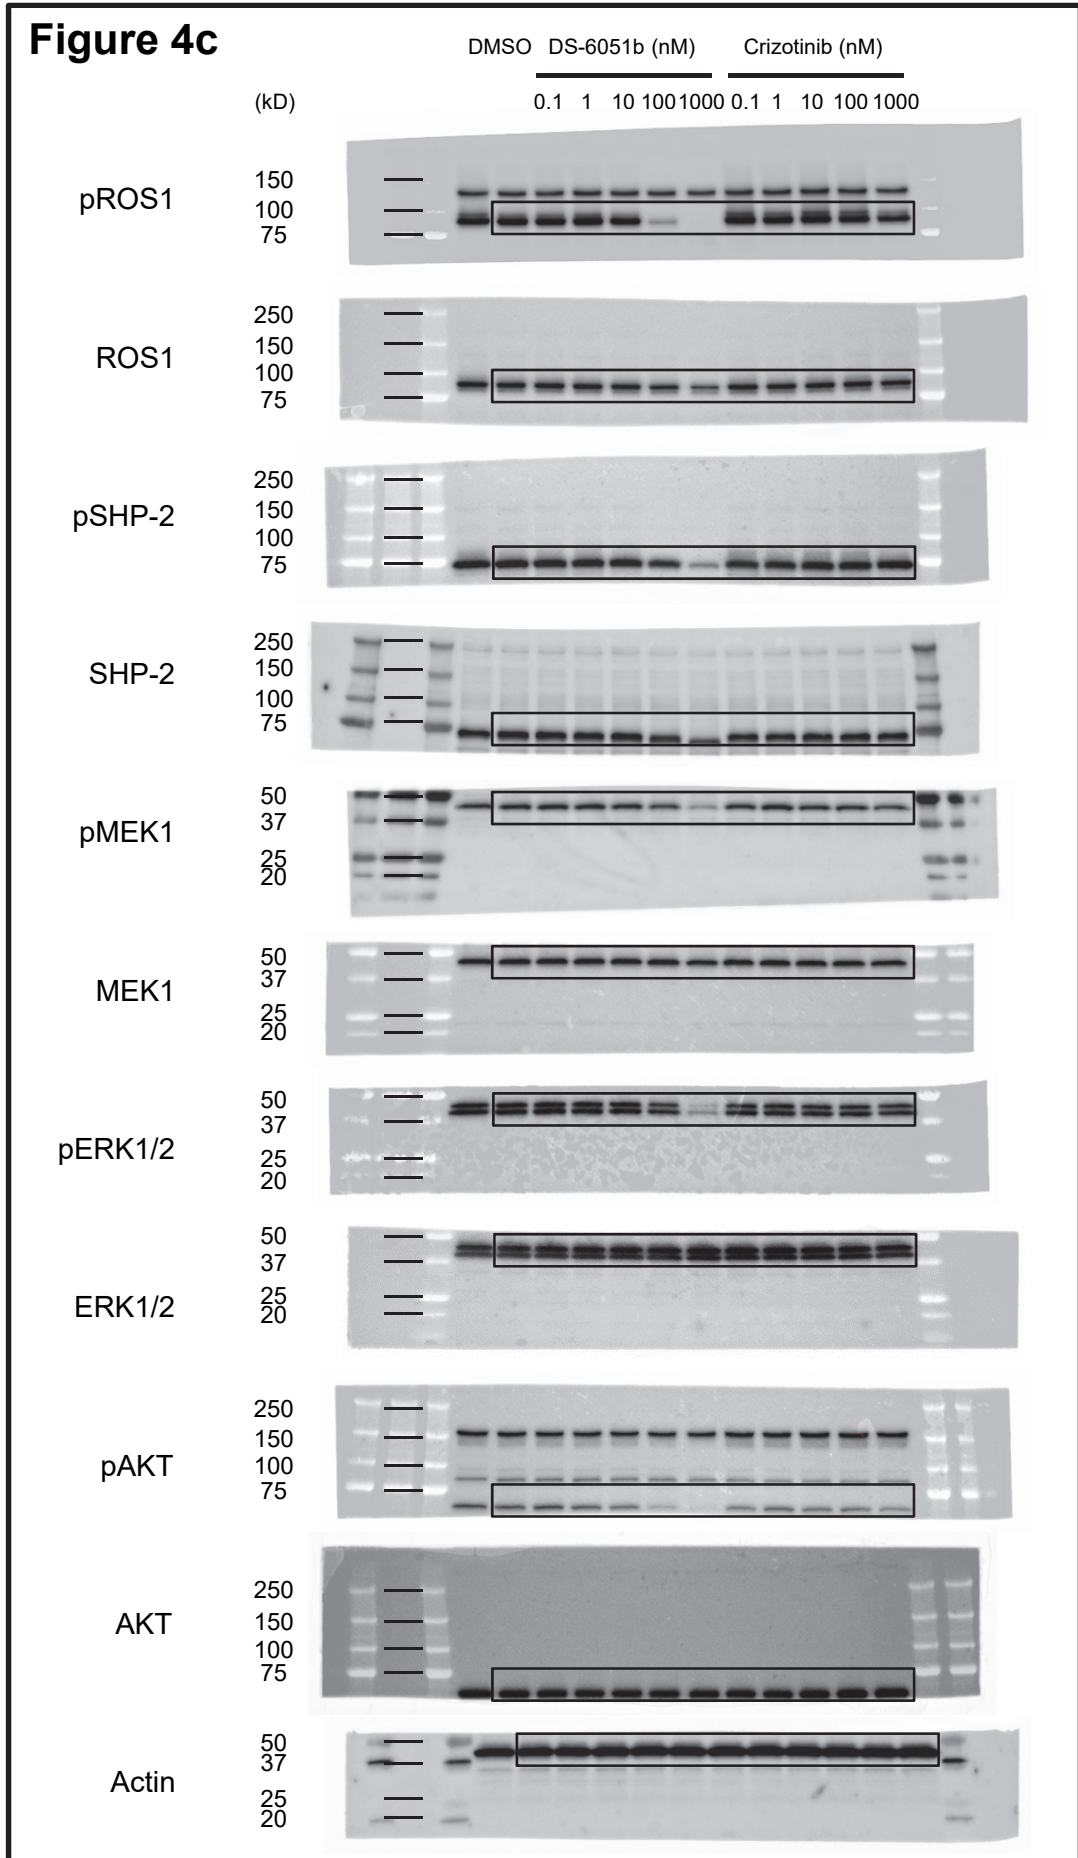

Supplementary Data: Original uncropped image of immunoblots (Fig 5f)

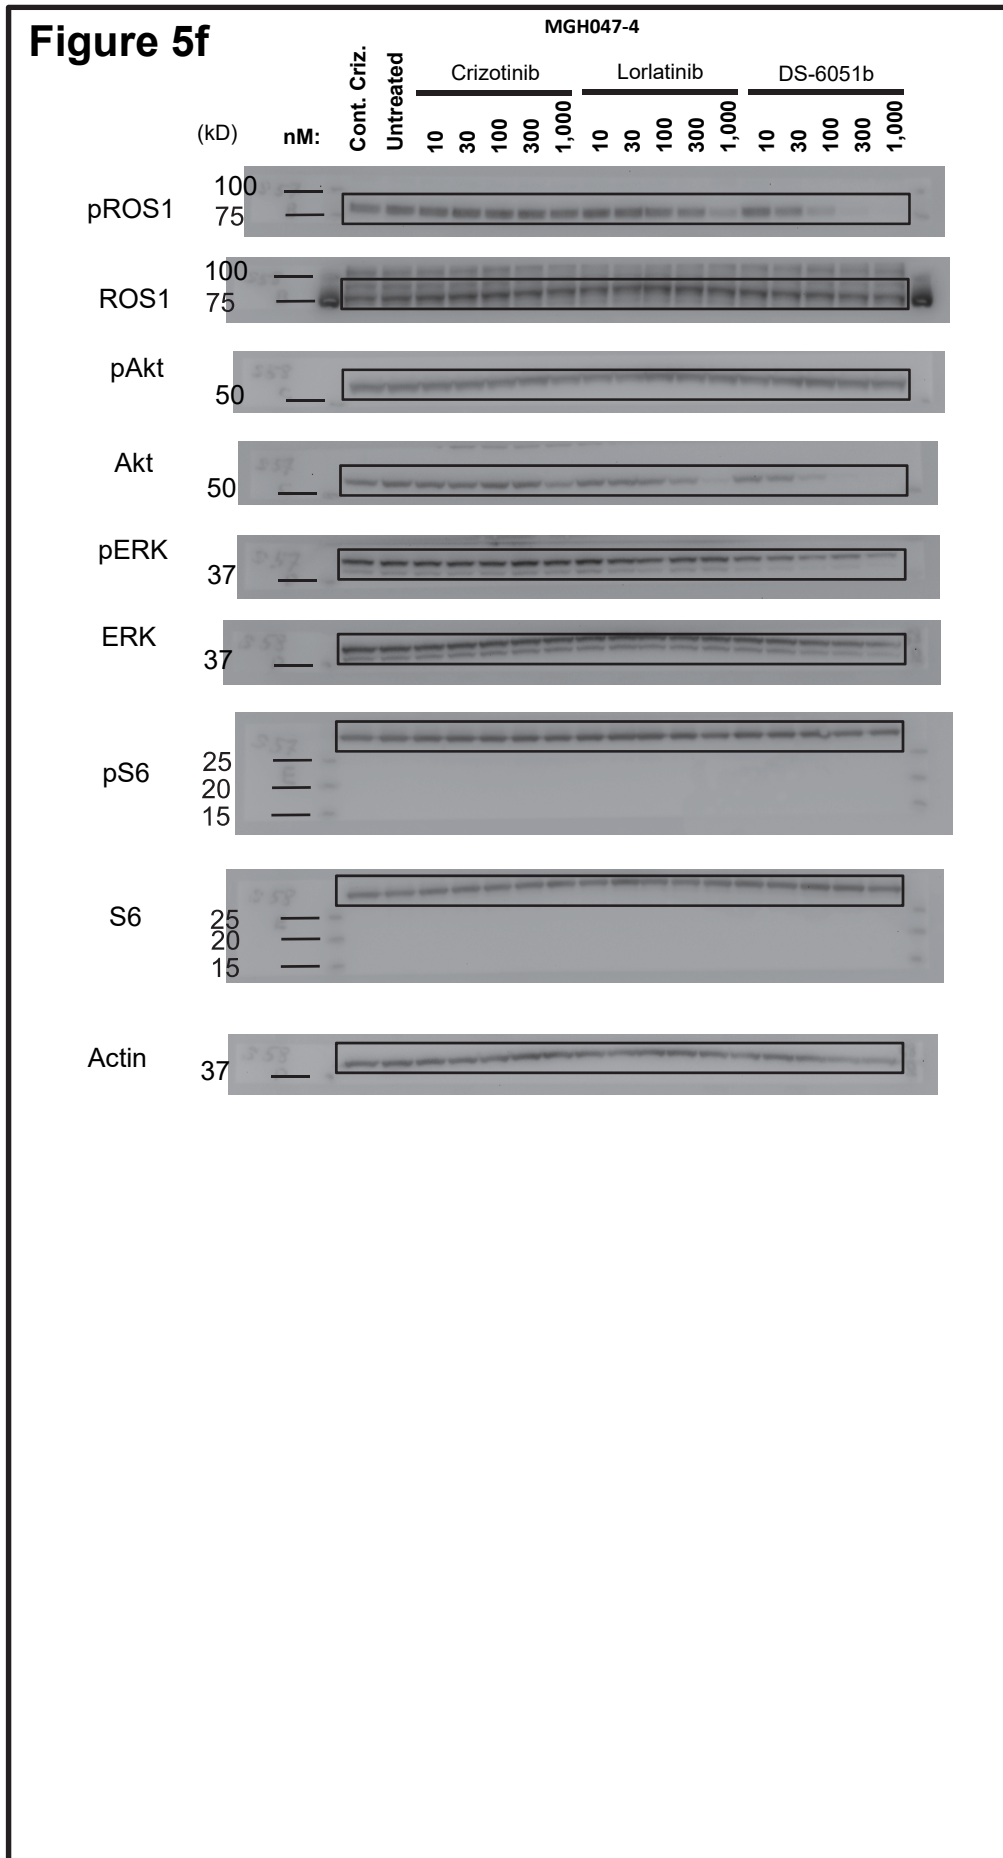

Supplementary Data: Original uncropped image of immunoblots (Fig 6a)

Figure 6a

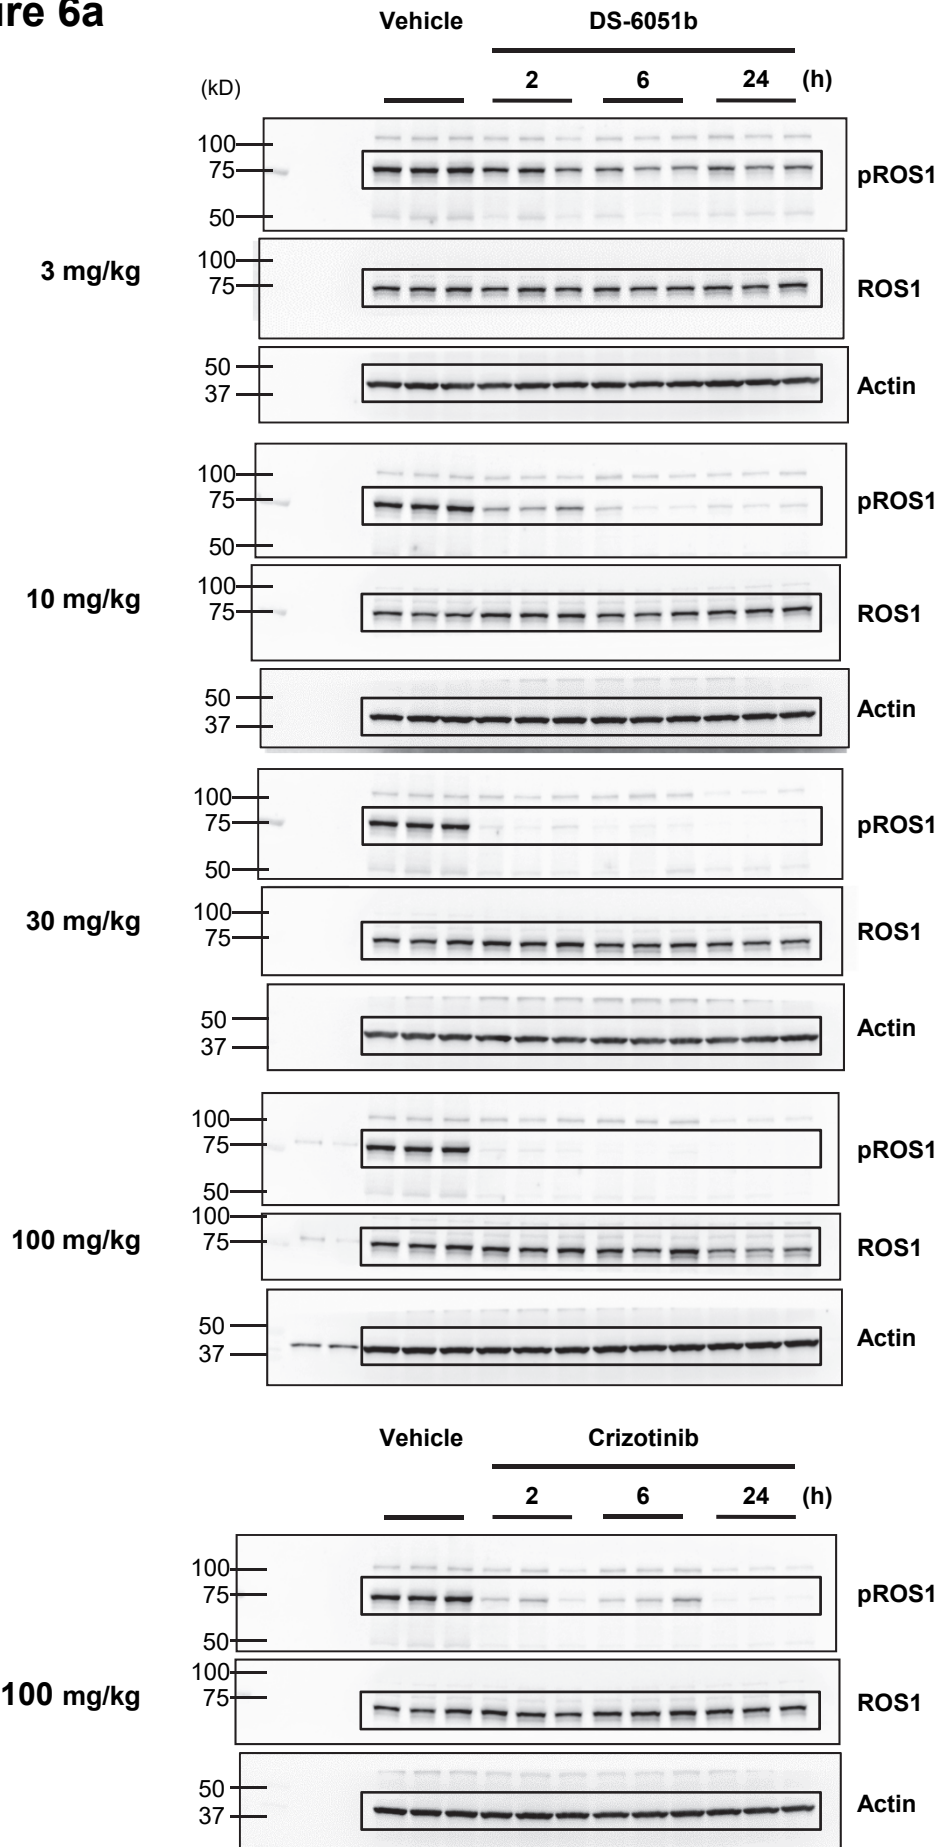

Supplementary Data: Original uncropped image of immunoblots (Fig 6b)

**Figure 6b**

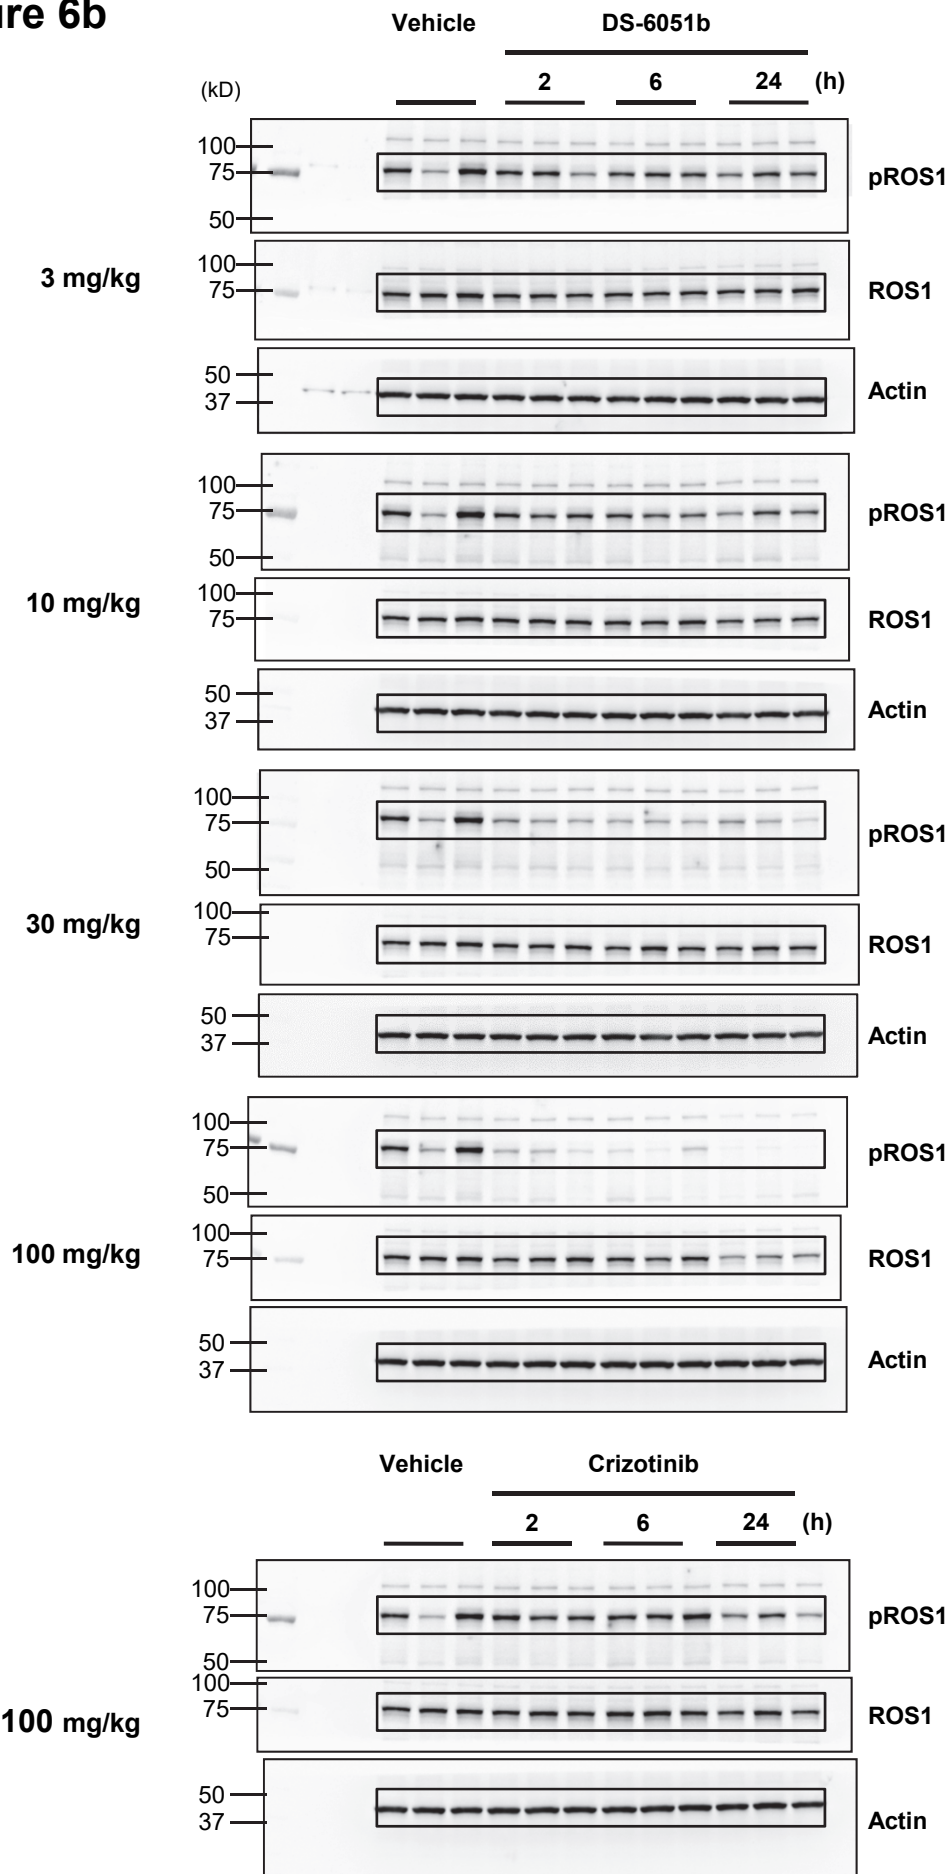



Supplementary Data: Original uncropped image of immunoblots (Fig 6e)

**Figure 6e**

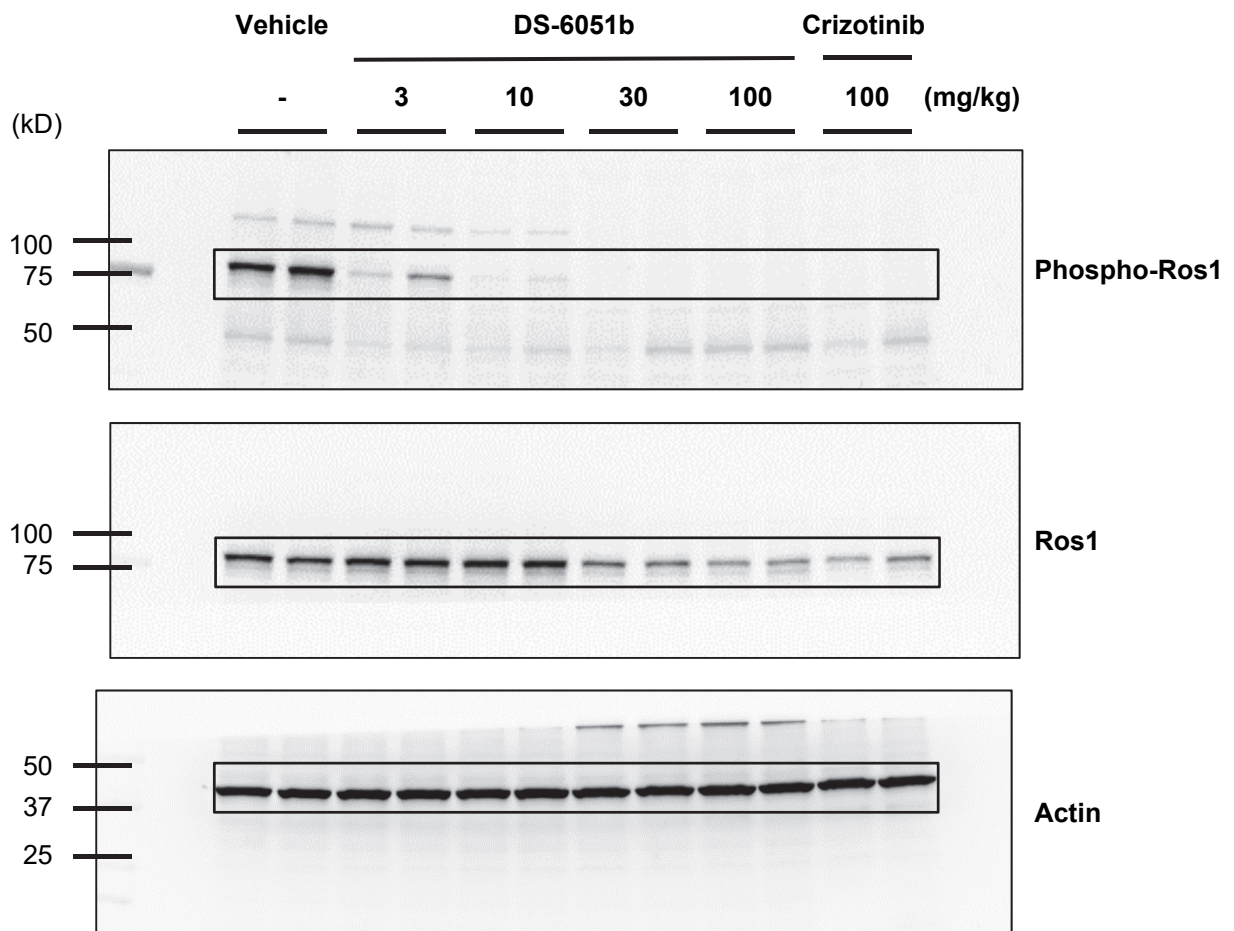



Supplementary Data: Original uncropped image of immunoblots (Fig 7e)

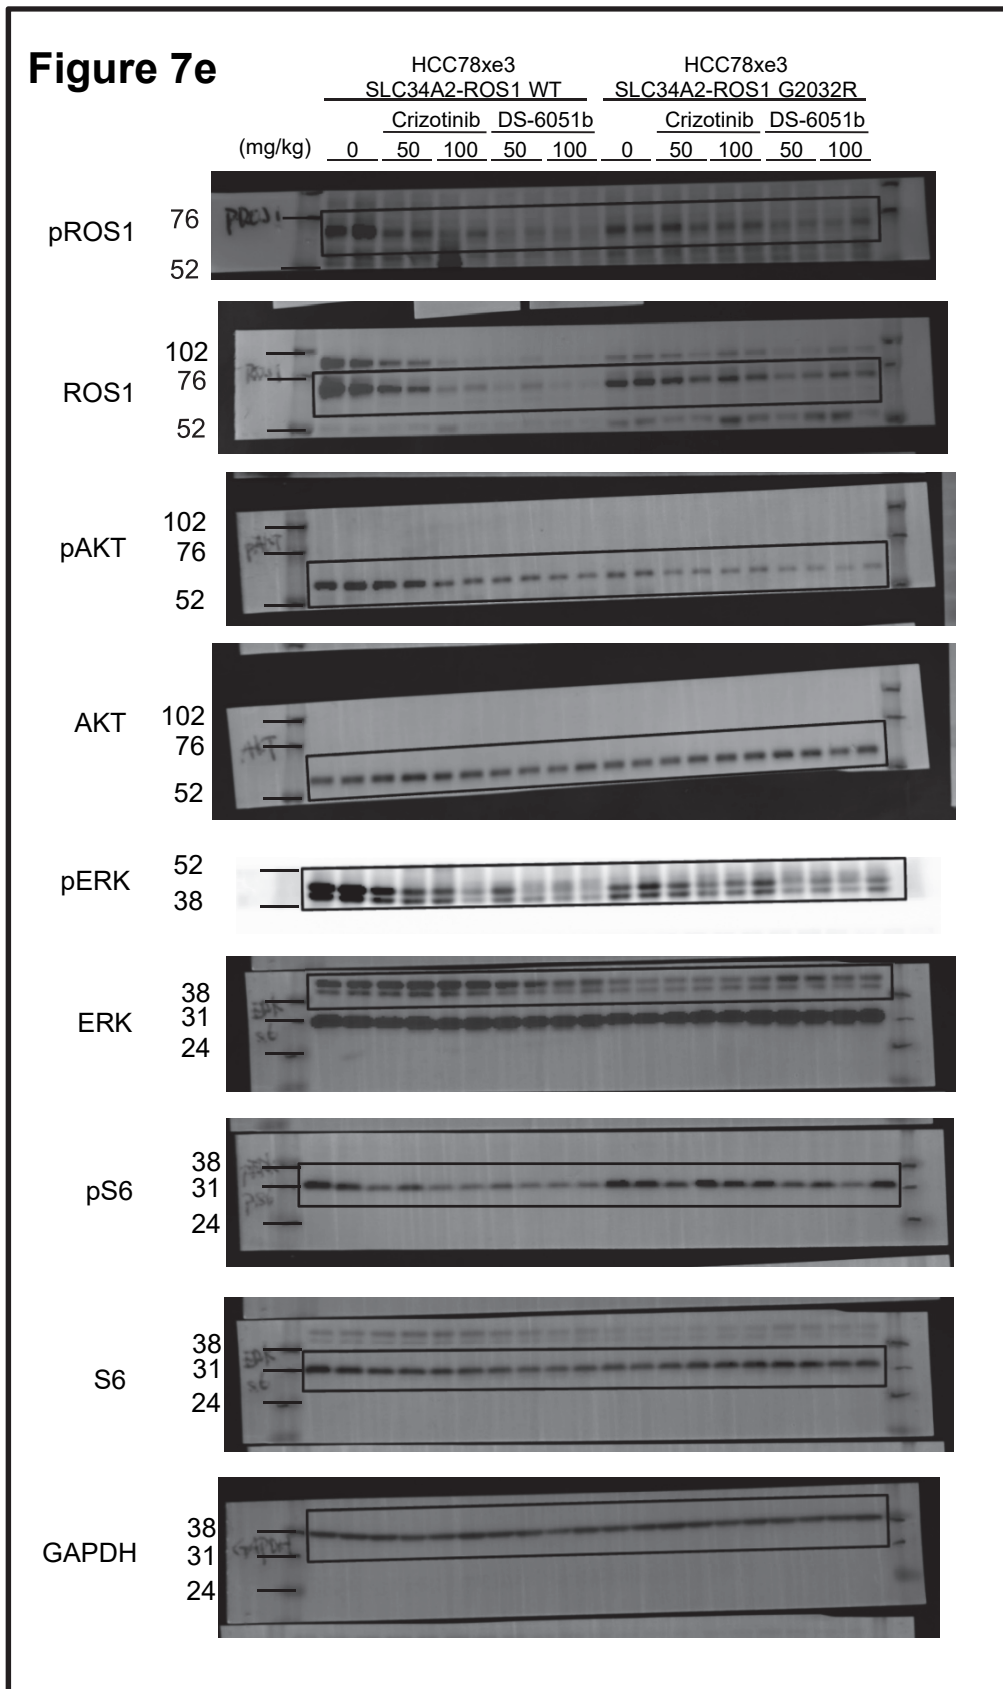

Supplement: 41467_2019_11496_MOESM7_ESM.pdf [file 41467_2019_11496_MOESM7_ESM.pdf]
