# Supplementary material for: The new-generation selective ROS1/NTRK inhibitor DS-6051b overcomes crizotinib resistant ROS1-G2032R mutation in preclinical models
Source: PubMed Central journal article supplement (PMC6688997; doi:10.1038/s41467-019-11496-z), 2019-08-09
Supplement: 41467_2019_11496_MOESM2_ESM.pdf [file 41467_2019_11496_MOESM2_ESM.pdf]

## **Description of Additional Supplementary Files**

**File name:** Supplementary Data 1

**Description:** Revised Supplementary Data\_in vitro kinase assay at KmATP: In vitro kinase assay data of DS-6051b against about 250 kinases at KmATP.

**File name:** Supplementary Data 2

**Description:** Revised supplementary Data\_NGS data of PDX or PDC models: mutation and gene alterations (fusion genes) of PDX model and PDCs (Patient derived cell lines).
